# Supplementary material
Source: MDPI journal article supplement (https://www.mdpi.com/2304-6767/9/12/146)
Supplement: s1 [file s1]

Supplementary Materials

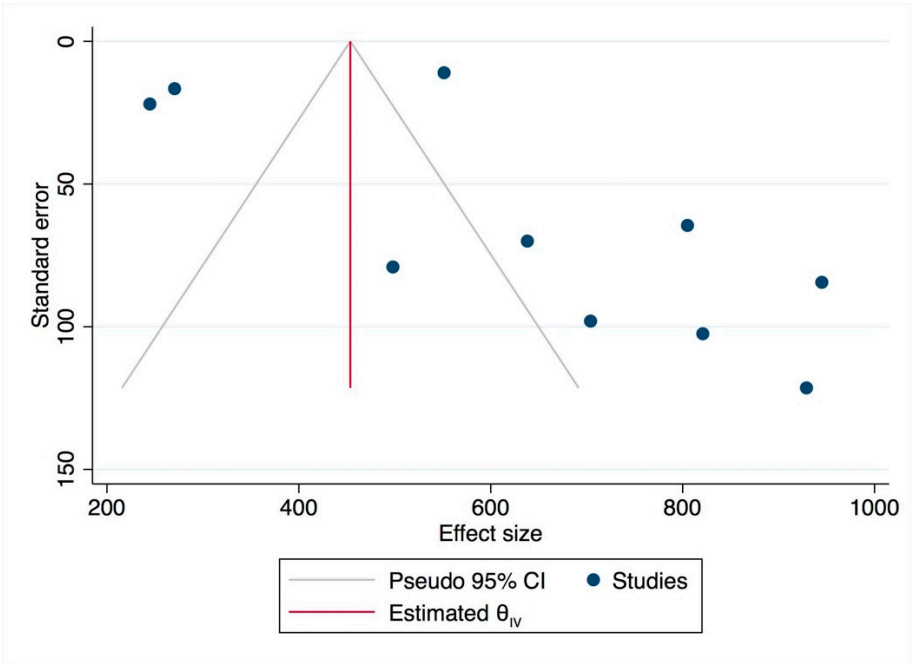

Figure S1: funnel plot for intact premolar group

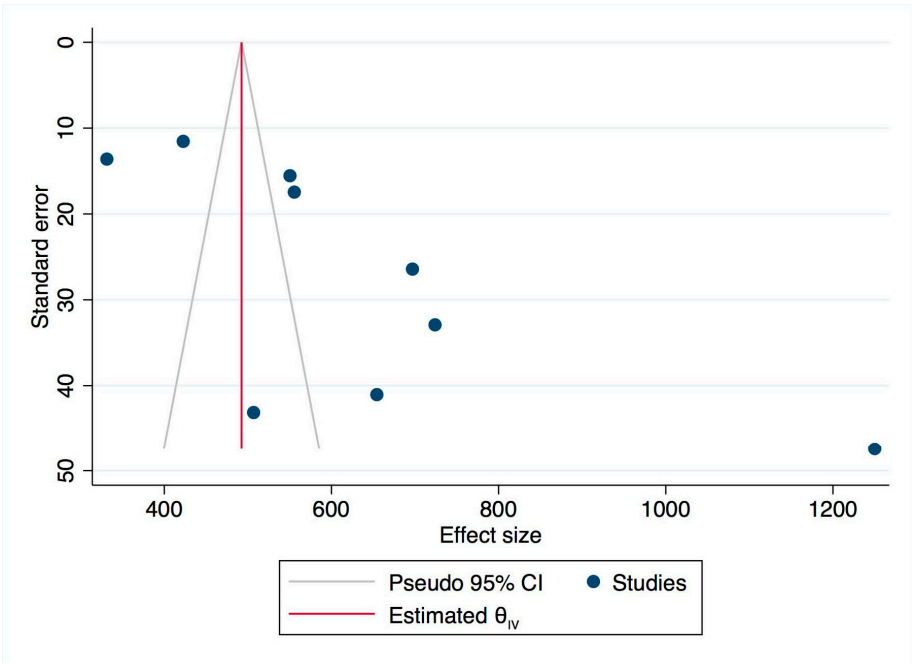

Figure S2: funnel plot for 0 wall lost group

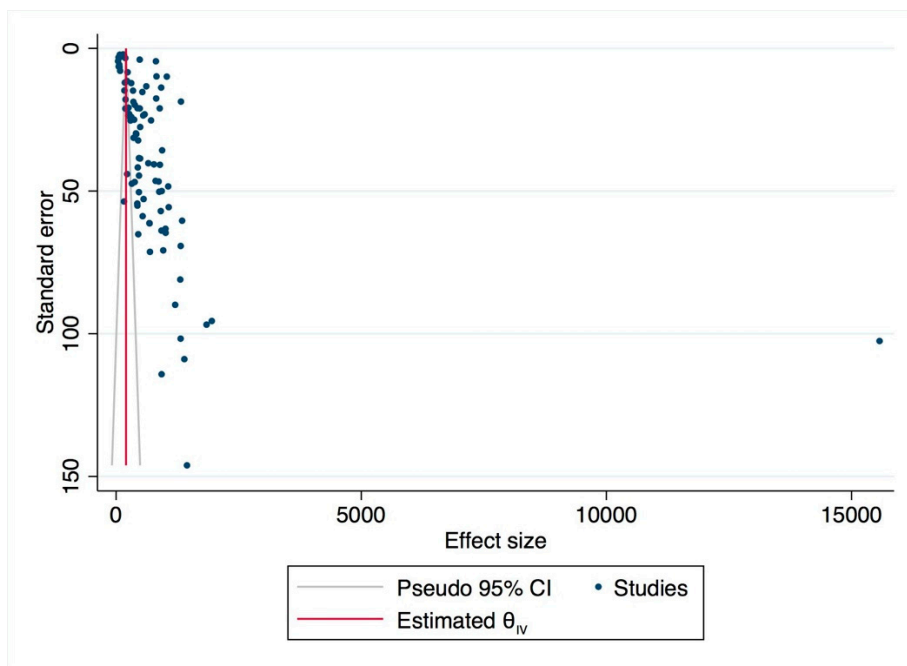

Figure S3: funnel plot for 1 wall lost group

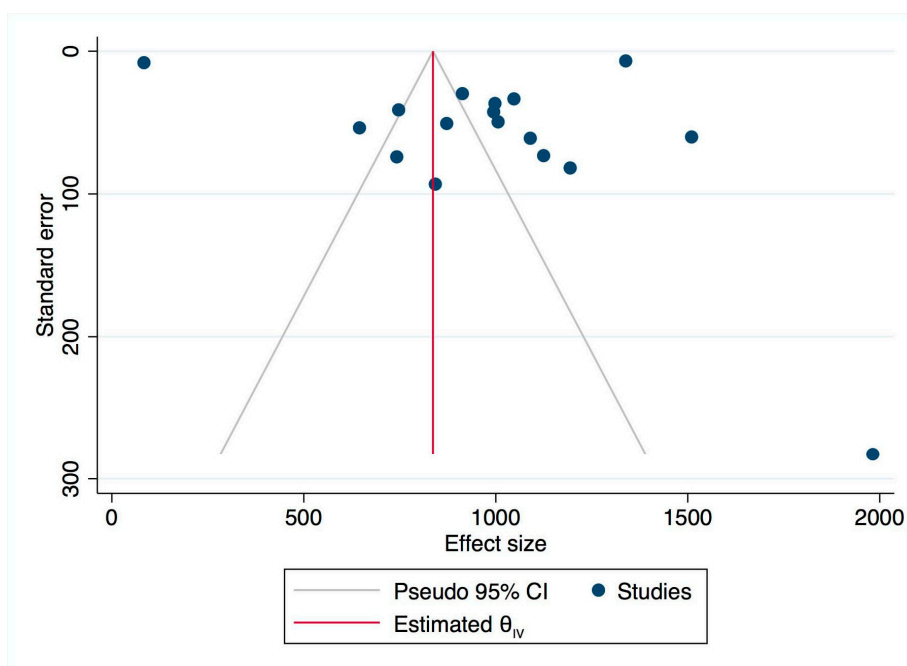

Figure S4: funnel plot for 2 walls lost group
